# Supplementary material
Source: PubMed Central journal article supplement (PMC3302444)
Supplement: supp_32.7.1260_MCB-MCB06420-11-s01.pdf [file supp_32.7.1260_MCB-MCB06420-11-s01.pdf]

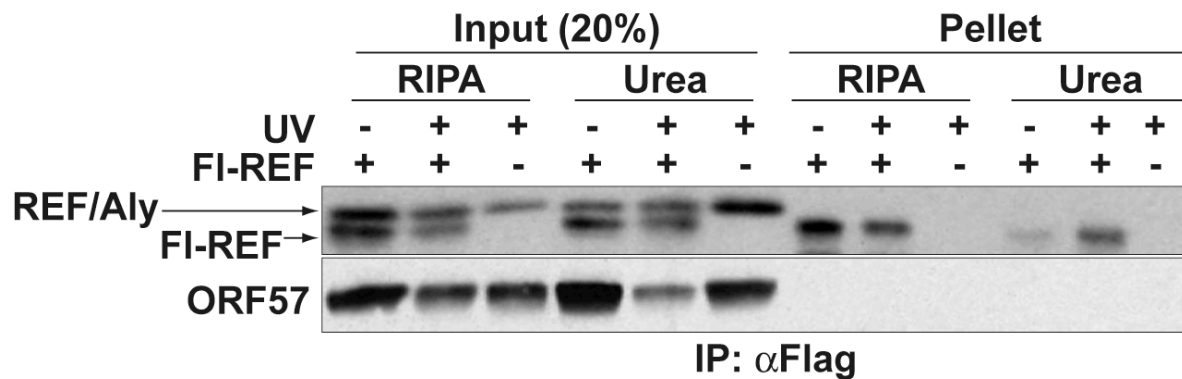

FIG. S1. UV cross-linking immunoprecipitation conditions abrogate the ORF57-REF interaction. UV cross-linking and immunoprecipitation with anti-Flag antibodies was performed as in Figures 1 and 2. The presence of FI-REF (top) or ORF57 (bottom) was examined in the inputs and pellets by western blot. Two different wash procedures were used as described in the Materials and Methods. One protocol included a wash step containing urea while the other was performed with RIPA buffer alone. FI-REF is immunoprecipitated under both of these conditions, but ORF57 is not co-immunoprecipitated.
